# Supplementary material for: Reverse Taxonomy for Elucidating Diversity of Insect-Associated Nematodes: A Case Study with Termites
Source: PLoS One. 2012 Aug 28;7(8):e43865. doi: 10.1371/journal.pone.0043865 (PMC3429485; doi:10.1371/journal.pone.0043865)
Supplement: Table S1 — Geographical and host/carrier information of nematodes. (EXL) (XLS) [file pone.0043865.s001.xls]

## Sheet: Suppl Table 1
	Supplemental Table 1. Geographical and host/carrier information of nematodes
	Climate	Country	Site	Lat	Long	Alt (m)	Collection date	Family		Genus	Species	Habitat	Feeding resource	Colony ID	Nematode ID	Method	Note
	Tropic	Panama	El Valle Campestre trail	8.61408	-80.1128	633	31MAY05	Kalotermitidae		Calcaritermes	brevicollis	wood	damp wood		Unknown species	Dissection
	Tropic	Panama	Llorona Nematode transects	9.34332	-79.7742		4JUN05	Kalotermitidae		Calcaritermes	emarginicollis nr	wood	damp wood		Pana1 sp. 5., Unknown species	Dissection
	Tropic	Panama	Llorona Nematode transects	9.34332	-79.7742		4JUN05	Kalotermitidae		Calcaritermes	emarginicollis nr	wood	damp wood		Oigolaimella sp. 7	Dissection
	Tropic	Panama	End of Pipeline road	9.12209	-79.7157	25	1JUN05	Kalotermitidae		Calcaritermes	temnocephalus	wood	damp wood		Diplo4 sp., Unknown species	Dissection
	Tropic	Costa Rica	La Selva	10.25525 N	84.00130 W	60	3/12-15/2005	Kalotermitidae		Calcaritermes	emarginicollis	wood	damp wood		Pana1 1	Dissection	T804Y1
	Tropic	Panama	Campestre Nematode transects	8.61623	-80.1103		31MAY05	Kalotermitidae		Comatermes	perfectus	wood	damp wood		Diplo1 sp. 1	Dissection
	Tropic	Panama	Campestre Nematode transects	8.61623	-80.1103		31MAY05	Kalotermitidae		Comatermes	perfectus	wood	damp wood		Halicephaobus sp. 5.	Dissection
	Tropic	Panama	Campestre Nematode transects	8.61623	-80.1103		31MAY05	Kalotermitidae		Comatermes	perfectus	wood	damp wood			Dissection
	Tropic	Panama	Campestre Nematode transects	8.61623	-80.1103		31MAY05	Kalotermitidae		Comatermes	perfectus	wood	damp wood			Dissection
	Tropic	Panama	Campestre Nematode transects	8.61623	-80.1103		31MAY05	Kalotermitidae		Comatermes	perfectus	wood	damp wood			Dissection
	Tropic	Panama	Campestre Nematode transects	8.61623	-80.1103		31MAY05	Kalotermitidae		Comatermes	perfectus	wood	damp wood			Dissection
	Tropic	Panama	Campestre Nematode transects	8.61623	-80.1103		31MAY05	Kalotermitidae		Comatermes	perfectus	wood	damp wood			Dissection
	Tropic	Panama	Campestre Nematode transects	8.61623	-80.1103		31MAY05	Kalotermitidae		Comatermes	perfectus	wood	damp wood			Dissection
	Tropic	Panama	Campestre Nematode transects	8.61623	-80.1103		31MAY05	Kalotermitidae		Comatermes	perfectus	wood	damp wood			Dissection
	Tropic	Panama	Campestre Nematode transects	8.61623	-80.1103		31MAY05	Kalotermitidae		Comatermes	perfectus	wood	damp wood			Dissection
	Tropic	Panama	Campestre Nematode transects	8.61623	-80.1103		31MAY05	Kalotermitidae		Comatermes	perfectus	wood	damp wood			Dissection
	Tropic	Panama	Campestre Nematode transects	8.61623	-80.1103		31MAY05	Kalotermitidae		Comatermes	perfectus	wood	damp wood			Dissection
	Tropic	Panama	Campestre Nematode transects	8.61623	-80.1103		31MAY05	Kalotermitidae		Comatermes	perfectus	wood	damp wood			Dissection
	Tropic	Panama	El Valle, Hotel Campestre	8.61435	-80.1129	6	29MAY05	Kalotermitidae		Comatermes	perfectus	wood	damp wood		Oigolaimella sp. 4	Dissection
	Subtropic	USA	SecretWoods Nature Center, Ft. Lauderdale, FL	26.06892 N	80.17779 W	1	38404	Kalotermitidae		Cryptotermes	cavifrons	wood	seasonally dry wood	#5	Unidentified 2	Dissection
	Subtropic	USA	SecretWoods Nature Center, Ft. Lauderdale, FL	26.06892 N	80.17779 W	1	38404	Kalotermitidae		Cryptotermes	cavifrons	wood	seasonally dry wood	#1		Dissection
	Subtropic	USA	SecretWoods Nature Center, Ft. Lauderdale, FL	26.06892 N	80.17779 W	1	38404	Kalotermitidae		Cryptotermes	cavifrons	wood	seasonally dry wood	#2		Dissection
	Subtropic	USA	SecretWoods Nature Center, Ft. Lauderdale, FL	26.06892 N	80.17779 W	1	38404	Kalotermitidae		Cryptotermes	cavifrons	wood	seasonally dry wood	#3		Dissection
	Subtropic	USA	SecretWoods Nature Center, Ft. Lauderdale, FL	26.06892 N	80.17779 W	1	38404	Kalotermitidae		Cryptotermes	cavifrons	wood	seasonally dry wood	#4		Dissection
	Tropic	Panama	Guanica Abajo	7.3509	-80.3638	19	29MAY05	Kalotermitidae		Cryptotermes	longicollis	wood	seasonally dry wood			Dissection
	Tropic	Panama	Isla Canas Wildlife Preserve	7.42355	-80.3146	9	29MAY05	Kalotermitidae		Cryptotermes	longicollis	wood	seasonally dry wood			Dissection
	Tropic	Panama	Playa Venado	7.43234	-80.2039	28	29MAY05	Kalotermitidae		Cryptotermes	longicollis	wood	seasonally dry wood			Dissection
	Tropic	Panama	Llorona Nematode transects	9.34332	-79.7742		4JUN05	Kalotermitidae		Glyptotermes	barbouri	wood	damp wood			Dissection
	Tropic	Panama	Fort Sherman mangroves	9.3534	-79.9459	5	3JUN05	Kalotermitidae		Incisitermes	schwarzi	wood	seasonally dry wood			Dissection
	Tropic	Panama	mangroves S. Anton	8.3042	-80.2854	6	30MAY05	Kalotermitidae		Incisitermes	schwarzi	wood	seasonally dry wood			Dissection
	Tropic	Panama	mangroves S. Anton	8.3042	-80.2854	6	30MAY05	Kalotermitidae		Incisitermes	schwarzi	wood	seasonally dry wood			Dissection
	Tropic	Panama	mangroves S. Anton	8.3042	-80.2854	6	30MAY05	Kalotermitidae		Incisitermes	schwarzi	wood	seasonally dry wood			Dissection
	Tropic	Panama	nr Palenque; seagrape	9.57705	-79.3222	13	2JUN05	Kalotermitidae		Incisitermes	schwarzi	wood	seasonally dry wood		Pana1 sp. 5.	Dissection
	Subtropic	USA	SecretWoods Nature Center, Ft. Lauderdale, FL	26.06892 N	80.17779 W	1	38404	Kalotermitidae		Incisitermes	snyderi	wood	seasonally dry wood		Poikilolaimus floridensis	Dissection
	Tropic	Panama	Isla Canas Wildlife Preserve	7.42355	-80.3146	9	29MAY05	Kalotermitidae		Neotermes	holmgreni	wood	seasonally dry wood		Halicephalobus sp. 3	Dissection
	Tropic	Panama	nr Palenque; seagrape	9.57705	-79.3222	13	2JUN05	Kalotermitidae		Neotermes	holmgreni	wood	seasonally dry wood			Dissection
	Subtropic	USA	SecretWoods Nature Center, Ft. Lauderdale, FL	26.06892 N	80.17779 W	1	38404	Kalotermitidae		Neotermes	castaneus	wood	damp wood	#3	Poikilolaimus floridensis	Dissection
	Subtropic	USA	SecretWoods Nature Center, Ft. Lauderdale, FL	26.06892 N	80.17779 W	1	38404	Kalotermitidae		Neotermes	castaneus	wood	damp wood	#1		Dissection
	Subtropic	USA	SecretWoods Nature Center, Ft. Lauderdale, FL	26.06892 N	80.17779 W	1	38404	Kalotermitidae		Neotermes	castaneus	wood	damp wood	#2		Dissection
	Subtropic	USA	SecretWoods Nature Center, Ft. Lauderdale, FL	26.06892 N	80.17779 W	1	38404	Kalotermitidae		Neotermes	jouteli	wood	seasonally dry wood		Poikilolaimus floridensis	Dissection
	Tropic	Panama	Sierra Llorona Los Nances trail	9.34349	-79.7738	216	4JUN05	Kalotermitidae		Rugitermes	panamae	wood	damp wood		Pana1 sp. 3	Dissection
	Tropic	Panama	El Cope Natl Park 2	8.66907	-80.5918	834	30MAY05	Rhinotermitidae		Coptotermes	testaceus	inside tree trunk	wood		Oigolaimella sp. 4.	Dissection
	Tropic	Panama	End of Pipeline road	9.12209	-79.7157		1JUN05	Rhinotermitidae		Coptotermes	testaceus	inside tree trunk	wood		Pana1 sp. 4., Tylenchid parasite (Howardula? sp. 2), Halicephalobus sp. 6.	Dissection
	Tropic	Costa Rica	La Selva	10.25525 N	84.00130 W	60	3/12-15/2005	Rhinotermitidae		Coptotermes	testaceus	inside tree trunk	wood	#1	Pseudaphelenchus sp. 1.	Dissection	T803X1
	Tropic	Costa Rica	La Selva	10.25525 N	84.00130 W	60	3/12-15/2005	Rhinotermitidae		Coptotermes	testaceus	inside tree trunk	wood	#2	Tylenchid parasite (Howardula? sp.) 1., Pseudaphelenchus yukiae	Dissection	T804W1
	Tropic	Costa Rica	La Selva	10.25525 N	84.00130 W	60	2008	Rhinotermitidae		Coptotermes	testaceus	inside tree trunk	wood		Halicephalobus sp. 2, Oigolaimella sp. 1, unidentified rhabditid (Rhabd1) sp. 2	Squash on BA	2008-09
	Tropic	Panama	14 km W Palenque	9.57692	-79.4085	14	2JUN05	Rhinotermitidae		Coptotermes	testaceus	inside tree trunk	wood		Oigolaimella sp. 2	Dissection
	Tropic	Panama	below El Cope park	8.64578	-80.588	800	30MAY05	Rhinotermitidae		Coptotermes	testaceus	inside tree trunk	wood			Dissection
	Tropic	Panama	El Charco trail, Soberania NP	9.08148	-79.666	28	1JUN05	Rhinotermitidae		Coptotermes	testaceus	inside tree trunk	wood		Unknown species	Dissection
	Tropic	Panama	El Cope Natl Park 1	8.67901	-80.5972	841	30MAY05	Rhinotermitidae		Coptotermes	testaceus	inside tree trunk	wood		Oigolaimella sp. 2., Unknown species	Dissection
	Tropic	Panama	El Valle, Hotel Campestre	8.61435	-80.1129	6	29MAY05	Rhinotermitidae		Coptotermes	testaceus	inside tree trunk	wood			Dissection
	Tropic	Panama	End of Pipeline road	9.12209	-79.7157		1JUN05	Rhinotermitidae		Coptotermes	testaceus	inside tree trunk	wood			Dissection
	Tropic	Panama	End of Pipeline road	9.12209	-79.7157		1JUN05	Rhinotermitidae		Coptotermes	testaceus	inside tree trunk	wood			Dissection
	Tropic	Panama	End of Pipeline road	9.12209	-79.7157		1JUN05	Rhinotermitidae		Coptotermes	testaceus	inside tree trunk	wood			Dissection
	Tropic	Panama	Guanica Abajo	7.3509	-80.3638	19	29MAY05	Rhinotermitidae		Coptotermes	testaceus	inside tree trunk	wood		Oigolaimella sp. 2, Steinernema sp.	Dissection
	Tropic	Panama	Playa Cambutal	7.25147	-80.5083	23	29MAY05	Rhinotermitidae		Coptotermes	testaceus	inside tree trunk	wood			Dissection
	Tropic	Panama	Playa Venado	7.43234	-80.2039	28	29MAY05	Rhinotermitidae		Coptotermes	testaceus	inside tree trunk	wood		Diplo4 sp.	Dissection
	Tropic	Panama	Playa Venado	7.43234	-80.2039	28	29MAY05	Rhinotermitidae		Coptotermes	testaceus	inside tree trunk	wood			Dissection
	Tropic	Panama	Portobelo	9.54451	-79.6725	23	2JUN05	Rhinotermitidae		Coptotermes	testaceus	inside tree trunk	wood			Dissection
	Tropic	Costa Rica	La Selva	10.25525 N	84.00130 W	60	3/12-15/2005	Rhinotermitidae		Coptotermes	testaceus	inside tree trunk	wood	#3		Dissection	T804X1sp1
	Tropic	Panama	Llorona Nematode transects	9.34332	-79.7742	184	4JUN05	Rhinotermitidae		Dolichorhinotermes	longidens	subterranean	wood			Dissection
	Tropic	Panama	Llorona Nematode transects	9.34332	-79.7742		4JUN05	Rhinotermitidae		Dolichorhinotermes	longidens	subterranean	wood			Dissection
	Tropic	Panama	BCI				MAY08	Rhinotermitidae		Heterotermes	convexinotatus	subterranean	wood	#3	Bunonema sp. 2	Squash on BA
	Tropic	Panama	BCI				MAY08	Rhinotermitidae		Heterotermes	convexinotatus	subterranean	wood	#1	Oigolaimella sp. 2	Squash on BA
	Tropic	Panama	BCI				MAY08	Rhinotermitidae		Heterotermes	convexinotatus	subterranean	wood	#2	Oigolaimella sp. 2	Squash on BA
	Tropic	Panama	Isla Canas Wildlife Preserve	7.42355	-80.3146	9	29MAY05	Rhinotermitidae		Heterotermes	convexinotatus	subterranean	wood		Steinernema sp.	Dissection
	Tropic	Panama	Playa Cambutal	7.25147	-80.5083	23	29MAY05	Rhinotermitidae		Heterotermes	convexinotatus	subterranean	wood			Dissection
	Tropic	Panama	BCI				MAY08	Rhinotermitidae		Heterotermes	tenuis	subterranean	wood	#4	Oigolaimella sp. 2	Squash on BA
	Tropic	Panama	BCI				MAY08	Rhinotermitidae		Heterotermes	tenuis	subterranean	wood	#1	Oigolaimella sp. 2 , Bunonema sp. 2	Squash on BA
	Tropic	Panama	BCI				MAY08	Rhinotermitidae		Heterotermes	tenuis	subterranean	wood	#2	Oigolaimella sp. 2 , Halicephalobus sp. 4.	Squash on BA
	Tropic	Panama	BCI				MAY08	Rhinotermitidae		Heterotermes	tenuis	subterranean	wood	#3		Squash on BA
	Tropic	Panama	BCI				MAY08	Rhinotermitidae		Heterotermes	tenuis	subterranean	wood	#5		Squash on BA
	Tropic	Panama	below El Cope park	8.64578	-80.588	800	30MAY05	Rhinotermitidae		Heterotermes	tenuis	subterranean	wood			Dissection
	Tropic	Panama	Campestre Nematode transects	8.61623	-80.1103	698	31MAY05	Rhinotermitidae		Heterotermes	tenuis	subterranean	wood		Oigolaimella sp. 4., Steinernema sp., Unknown species	Dissection
	Tropic	Panama	Campestre Nematode transects	8.61623	-80.1103	698	31MAY05	Rhinotermitidae		Heterotermes	tenuis	subterranean	wood		Pana1 sp. 7, Steinernema sp., Unknown species	Dissection
	Tropic	Panama	Campestre Nematode transects	8.61623	-80.1103	698	31MAY05	Rhinotermitidae		Heterotermes	tenuis	subterranean	wood		Unknown species	Dissection
	Tropic	Panama	Campestre Nematode transects	8.61623	-80.1103	698	31MAY05	Rhinotermitidae		Heterotermes	tenuis	subterranean	wood		Unknown species	Dissection
	Tropic	Panama	Campestre Nematode transects	8.61623	-80.1103		31MAY05	Rhinotermitidae		Heterotermes	tenuis	subterranean	wood		Oigolaimella sp. 2	Dissection
	Tropic	Panama	Campestre Nematode transects	8.61623	-80.1103		31MAY05	Rhinotermitidae		Heterotermes	tenuis	subterranean	wood			Dissection
	Tropic	Panama	El Charco trail, Soberania NP	9.08148	-79.666		1JUN05	Rhinotermitidae		Heterotermes	tenuis	subterranean	wood		Cruznema sp. 2	Dissection
	Tropic	Panama	El Cope Natl Park 1	8.67901	-80.5972	841	30MAY05	Rhinotermitidae		Heterotermes	tenuis	subterranean	wood			Dissection
	Tropic	Panama	El Cope Natl Park 2	8.66907	-80.5918	834	30MAY05	Rhinotermitidae		Heterotermes	tenuis	subterranean	wood		Oigolaimella sp. 4	Dissection
	Tropic	Panama	El Valle trail west of town	8.61309	-80.1448	610	31MAY05	Rhinotermitidae		Heterotermes	tenuis	subterranean	wood		Oigolaimella sp. 5., Steinernema sp.	Dissection
	Tropic	Panama	El Valle, Hotel Campestre	8.61435	-80.1129	6	29MAY05	Rhinotermitidae		Heterotermes	tenuis	subterranean	wood		Unknown species	Dissection
	Tropic	Panama	El Valle, Hotel Campestre	8.61435	-80.1129	6	29MAY05	Rhinotermitidae		Heterotermes	tenuis	subterranean	wood		Ps. vindai	Dissection
	Tropic	Panama	El Valle, Hotel Campestre	8.61435	-80.1129	6	29MAY05	Rhinotermitidae		Heterotermes	tenuis	subterranean	wood			Dissection
	Tropic	Panama	El Valle, Hotel Campestre	8.61435	-80.1129	6	29MAY05	Rhinotermitidae		Heterotermes	tenuis	subterranean	wood			Dissection
	Tropic	Panama	End of Pipeline road	9.12209	-79.7157		1JUN05	Rhinotermitidae		Heterotermes	tenuis	subterranean	wood			Dissection
	Tropic	Panama	Forest Reserve Aquas Buenas	9.09172	-79.6155		1JUN05	Rhinotermitidae		Heterotermes	tenuis	subterranean	wood		Oigolaimella sp. 2	Dissection
	Tropic	Panama	Forest Reserve Aquas Buenas	9.09172	-79.6155		1JUN05	Rhinotermitidae		Heterotermes	tenuis	subterranean	wood			Dissection
	Tropic	Panama	Llorona Nematode transects	9.34332	-79.7742		4JUN05	Rhinotermitidae		Heterotermes	tenuis	subterranean	wood		Diplo4 sp.	Dissection
	Tropic	Panama	Llorona Nematode transects	9.34332	-79.7742		4JUN05	Rhinotermitidae		Heterotermes	tenuis	subterranean	wood		Unknown species	Dissection
	Tropic	Panama	Llorona Nematode transects	9.34332	-79.7742		4JUN05	Rhinotermitidae		Heterotermes	tenuis	subterranean	wood		Unknown species	Dissection
	Tropic	Panama	Llorona Nematode transects	9.34332	-79.7742		4JUN05	Rhinotermitidae		Heterotermes	tenuis	subterranean	wood		Halicephalobus sp. 4	Dissection
	Tropic	Panama	Llorona Nematode transects	9.34332	-79.7742		4JUN05	Rhinotermitidae		Heterotermes	tenuis	subterranean	wood		Unknown species	Dissection
	Tropic	Panama	Llorona Nematode transects	9.34332	-79.7742		4JUN05	Rhinotermitidae		Heterotermes	tenuis	subterranean	wood		Oigolaimella sp. 2	Dissection
	Tropic	Panama	Llorona Nematode transects	9.34332	-79.7742		4JUN05	Rhinotermitidae		Heterotermes	tenuis	subterranean	wood		Oigolaimella sp. 2	Dissection
	Tropic	Panama	Llorona Nematode transects	9.34332	-79.7742		4JUN05	Rhinotermitidae		Heterotermes	tenuis	subterranean	wood		Oigolaimella sp. 2	Dissection
	Tropic	Panama	Llorona Nematode transects	9.34332	-79.7742		4JUN05	Rhinotermitidae		Heterotermes	tenuis	subterranean	wood		Oigolaimella sp. 2.	Dissection
	Tropic	Panama	Llorona Nematode transects	9.34332	-79.7742		4JUN05	Rhinotermitidae		Heterotermes	tenuis	subterranean	wood		Pana1 sp. 6., Diplo4 sp.	Dissection
	Tropic	Panama	Llorona Nematode transects	9.34332	-79.7742		4JUN05	Rhinotermitidae		Heterotermes	tenuis	subterranean	wood			Dissection
	Tropic	Panama	Llorona Nematode transects	9.34332	-79.7742		4JUN05	Rhinotermitidae		Heterotermes	tenuis	subterranean	wood			Dissection
	Tropic	Panama	Llorona Nematode transects	9.34332	-79.7742		4JUN05	Rhinotermitidae		Heterotermes	tenuis	subterranean	wood			Dissection
	Tropic	Panama	Llorona Nematode transects	9.34332	-79.7742		4JUN05	Rhinotermitidae		Heterotermes	tenuis	subterranean	wood			Dissection
	Tropic	Panama	Llorona Nematode transects	9.34332	-79.7742		4JUN05	Rhinotermitidae		Heterotermes	tenuis	subterranean	wood			Dissection
	Tropic	Panama	Llorona Nematode transects	9.34332	-79.7742		4JUN05	Rhinotermitidae		Heterotermes	tenuis	subterranean	wood			Dissection
	Tropic	Panama	nr Palenque; seagrape	9.57705	-79.3222	13	2JUN05	Rhinotermitidae		Prorhinotermes	molinoi	soil/wood	wood			Dissection
	Subtropic	USA	SecretWoods Nature Center, Ft. Lauderdale, FL	26.06892 N	80.17779 W	1	38404	Rhinotermitidae		Prorhinotermes	simplex	soil/wood	wood	#1	Unidentified 3	Dissection
	Subtropic	USA	SecretWoods Nature Center, Ft. Lauderdale, FL	26.06892 N	80.17779 W	1	38404	Rhinotermitidae		Prorhinotermes	simplex	soil/wood	wood	#2		Dissection
	Subtropic	USA	SecretWoods Nature Center, Ft. Lauderdale, FL	26.06892 N	80.17779 W	1	38404	Rhinotermitidae		Reticulitermes	flavipes	subterranean	wood	#1	Rhabditis rainai	Dissection
	Subtropic	USA	SecretWoods Nature Center, Ft. Lauderdale, FL	26.06892 N	80.17779 W	1	38404	Rhinotermitidae		Reticulitermes	flavipes	subterranean	wood	#3	Unidentified 3, 4	Dissection
	Subtropic	USA	SecretWoods Nature Center, Ft. Lauderdale, FL	26.06892 N	80.17779 W	1	38404	Rhinotermitidae		Reticulitermes	flavipes	subterranean	wood	#2		Dissection
	Temprate	USA	Nebraska, USA					Rhinotermitidae		Reticulitermes	flavipes	subterranean	wood		Unidentified 1	Dissection	Lab colony
	Tropic	Panama	BCI				MAY08	Termitidae	Termitinae	Amitermes	beaumonti	subterranean	wood	#4	Halicephalobus sp. 4	Squash on BA
	Tropic	Panama	BCI				MAY08	Termitidae	Termitinae	Amitermes	beaumonti	subterranean	wood	#1	Cruznema sp. 1	Squash on BA
	Tropic	Panama	BCI				MAY08	Termitidae	Termitinae	Amitermes	beaumonti	subterranean	wood	#3	Ps. vindai, Halicephalobus sp. 4	Squash on BA
	Tropic	Panama	BCI				MAY08	Termitidae	Termitinae	Amitermes	beaumonti	subterranean	wood	#2	Ps. vindai, Oigolaimella sp. 3, Halicephalobus sp. 4, Cruznema sp. 1	Squash on BA
	Tropic	Panama	Campestre Nematode transects	8.61623	-80.1103	698	31MAY05	Termitidae	Termitinae	Amitermes	beaumonti	subterranean	wood		Aphel2. sp.	Dissection
	Tropic	Panama	Campestre Nematode transects	8.61623	-80.1103		31MAY05	Termitidae	Termitinae	Amitermes	beaumonti	subterranean	wood		Unknown species	Dissection
	Tropic	Panama	Campestre Nematode transects	8.61623	-80.1103		31MAY05	Termitidae	Termitinae	Amitermes	beaumonti	subterranean	wood		Halicephalobus sp. 6	Dissection
	Tropic	Panama	Campestre Nematode transects	8.61623	-80.1103		31MAY05	Termitidae	Termitinae	Amitermes	beaumonti	subterranean	wood		Oigolaimella sp. 2	Dissection
	Tropic	Panama	Campestre Nematode transects	8.61623	-80.1103	698	31MAY05	Termitidae	Termitinae	Amitermes	beaumonti	subterranean	wood			Dissection
	Tropic	Panama	El Valle Campestre trail	8.61408	-80.1128	633	31MAY05	Termitidae	Termitinae	Amitermes	beaumonti	subterranean	wood		Halicephalobus sp. 6	Dissection
	Tropic	Panama	El Valle, Hotel Campestre	8.61435	-80.1129	6	29MAY05	Termitidae	Termitinae	Amitermes	beaumonti	subterranean	wood		Halicephalobus sp. 6	Dissection
	Tropic	Panama	Forest Reserve Aquas Buenas	9.09172	-79.6155		1JUN05	Termitidae	Termitinae	Amitermes	beaumonti	subterranean	wood		Diplo2 sp. 1	Dissection
	Tropic	Panama	Llorona Nematode transects	9.34332	-79.7742		4JUN05	Termitidae	Termitinae	Amitermes	beaumonti	subterranean	wood		Diplo2 sp. 2	Dissection
	Tropic	Panama	Llorona Nematode transects	9.34332	-79.7742		4JUN05	Termitidae	Termitinae	Amitermes	beaumonti	subterranean	wood		Oigolaimella sp. 6	Dissection
	Tropic	Panama	Llorona Nematode transects	9.34332	-79.7742		4JUN05	Termitidae	Termitinae	Amitermes	beaumonti	subterranean	wood		Pana1 sp. 6., Thelastomatidae sp.	Dissection
	Tropic	Panama	Llorona Nematode transects	9.34332	-79.7742		4JUN05	Termitidae	Termitinae	Amitermes	beaumonti	subterranean	wood			Dissection
	Tropic	Panama	Llorona Nematode transects	9.34332	-79.7742		4JUN05	Termitidae	Termitinae	Amitermes	beaumonti	subterranean	wood			Dissection
	Tropic	Panama	Llorona Nematode transects	9.34332	-79.7742		4JUN05	Termitidae	Termitinae	Amitermes	beaumonti	subterranean	wood			Dissection
	Tropic	Panama	Llorona Nematode transects	9.34332	-79.7742		4JUN05	Termitidae	Termitinae	Amitermes	beaumonti	subterranean	wood			Dissection
	Tropic	Panama	Llorona Nematode transects	9.34332	-79.7742		4JUN05	Termitidae	Termitinae	Amitermes	beaumonti	subterranean	wood			Dissection
	Tropic	Panama	Llorona Nematode transects	9.34332	-79.7742		4JUN05	Termitidae	Termitinae	Amitermes	beaumonti	subterranean	wood			Dissection
	Tropic	Panama	Playa Cambutal	7.25147	-80.5083	23	29MAY05	Termitidae	Termitinae	Amitermes	beaumonti	subterranean	wood			Dissection
	Tropic	Panama	W. La Pintada	8.63077	-80.4863	109	30MAY05	Termitidae	Termitinae	Amitermes	beaumonti	subterranean	wood			Dissection
	Tropic	Panama	Pocri area pastureland	7.67865	-80.1597	59	29MAY05	Termitidae	Termitinae	Amitermes	foreli	soil mound	grass		Oigolaimella sp. 4.	Dissection
	Tropic	Panama	Pocri area pastureland	7.67865	-80.1597	59	29MAY05	Termitidae	Termitinae	Amitermes	foreli	soil mound	grass			Dissection
	Tropic	Panama	Pocri area pastureland	7.67865	-80.1597	59	29MAY05	Termitidae	Termitinae	Amitermes	foreli	soil mound	grass			Dissection
	Tropic	Costa Rica	La Selva	10.25525 N	84.00130 W	60	3/12-15/2005	Termitidae	Apicotermitinae	Anoplotermes	parvus	soil mound	soil			Dissection	T804Z1
	Tropic	Costa Rica	La Selva	10.25525 N	84.00130 W	60	3/12-15/2005	Termitidae	Apicotermitinae	Anoplotermes	parvus	soil mound	soil			Dissection	T803Z2
	Tropic	Costa Rica	La Selva	10.25525 N	84.00130 W	60	3/12-15/2005	Termitidae	Apicotermitinae	Anoplotermes	parvus	soil mound	soil		Poikilolaimus sp. 1.	Dissection	T804W2
	Tropic	Costa Rica	La Selva	10.25525 N	84.00130 W	60	3/12-15/2005	Termitidae	Apicotermitinae	Anoplotermes	parvus	soil mound	soil			Dissection	T804Z2
	Tropic	Costa Rica	La Selva	10.25525 N	84.00130 W	60	3/12-15/2005	Termitidae	Apicotermitinae	Anoplotermes	parvus	soil mound	soil		Unknown species	Dissection	T801Z2
	Tropic	Panama	Llorona Nematode transects	9.34332	-79.7742		4JUN05	Termitidae	Apicotermitinae	Anoplotermes	parvus	soil mound	soil			Dissection
	Tropic	Panama	BCI				MAY08	Termitidae	Apicotermitinae	Anoplotermes	parvus	soil mound	soil			Squash on BA
	Tropic	Panama	End of Pipeline road	9.12209	-79.7157	25	1JUN05	Termitidae	Apicotermitinae	Anoplotermes	parvus	soil mound	soil			Dissection
	Tropic	Panama	14 km W Palenque	9.57692	-79.4085	14	2JUN05	Termitidae	Apicotermitinae	Anoplotermes	s.l. n.sp.A	subterranean	soil			Dissection
	Tropic	Panama	Campestre Nematode transects	8.61623	-80.1103		31MAY05	Termitidae	Apicotermitinae	Anoplotermes	s.l. n.sp.A	subterranean	soil		Oigolaimella sp. 4., Oigolaimella sp. 7.	Dissection
	Tropic	Panama	Campestre Nematode transects	8.61623	-80.1103		31MAY05	Termitidae	Apicotermitinae	Anoplotermes	s.l. n.sp.A	subterranean	soil			Dissection
	Tropic	Panama	El Valle, Hotel Campestre	8.61435	-80.1129	6	29MAY05	Termitidae	Apicotermitinae	Anoplotermes	s.l. n.sp.A	subterranean	soil			Dissection
	Tropic	Panama	Rio Rita	9.29503	-79.81	88	2JUN05	Termitidae	Apicotermitinae	Anoplotermes	s.l. n.sp.A	subterranean	soil			Dissection
	Tropic	Panama	Sherman Forest Reserve	9.36073	-79.9627	59	3JUN05	Termitidae	Apicotermitinae	Anoplotermes	s.l. n.sp.A	subterranean	soil			Dissection
	Tropic	Panama	Campestre Nematode transects	8.61623	-80.1103		31MAY05	Termitidae	Apicotermitinae	Anoplotermes	s.l. n.sp.B	subterranean	soil			Dissection
	Tropic	Panama	W. La Pintada	8.63077	-80.4863	109	30MAY05	Termitidae	Apicotermitinae	Anoplotermes	s.l. n.sp.B	subterranean	soil			Dissection
	Tropic	Costa Rica	La Selva	10.25525 N	84.00130 W	60	3/12-15/2005	Termitidae	Apicotermitinae	Anoplotermes	schwarzi	subterranean	soil		Oscheius sp., Unknown species	Dissection	T804X1sp2
	Tropic	Panama	Sierra Llorona Los Nances trail	9.3426	-79.7745	187	2JUN05	Termitidae	Nasutitermitinae	Coatitermes	clevelandi	subterranean	soil		Thelastomatidae sp. 3	Dissection
	Tropic	Panama	BCI				MAY08	Termitidae	Syntermitinae	Cornitermes	walkeri	subterranean	wood	#1	Thelastomatidae sp. 2	Dissection / Squash on BA
	Tropic	Panama	BCI				MAY08	Termitidae	Syntermitinae	Cornitermes	walkeri	subterranean	wood	#2	Thelastomatidae sp. 2	Dissection / Squash on BA
	Tropic	Panama	BCI				MAY08	Termitidae	Syntermitinae	Cornitermes	walkeri	subterranean	wood	#3		Squash on BA
	Tropic	Panama	End of Pipeline road	9.12209	-79.7157	25	1JUN05	Termitidae	Syntermitinae	Cornitermes	walkeri	subterranean	wood		Thelastomatidae sp. 2., Oigolaimella sp. 4	Dissection
	Tropic	Panama	End of Pipeline road	9.12209	-79.7157		1JUN05	Termitidae	Syntermitinae	Cornitermes	walkeri	subterranean	wood			Dissection
	Tropic	Panama	Forest Reserve Aquas Buenas	9.09172	-79.6155	30	1JUN05	Termitidae	Syntermitinae	Cornitermes	walkeri	subterranean	wood		Oigolaimella sp. 4., Thelastomatidae sp. 2	Dissection
	Tropic	Panama	Sherman Forest Reserve	9.36073	-79.9627	59	3JUN05	Termitidae	Syntermitinae	Cornitermes	walkeri	subterranean	wood		Pana1 sp. 6., Diplo4 sp., Thelastomatidae sp. 2	Dissection
	Tropic	Panama	Sherman Forest Reserve	9.36073	-79.9627	59	3JUN05	Termitidae	Syntermitinae	Cornitermes	walkeri	subterranean	wood		Pana1 sp. 6., Thelastomatidae sp. 2	Dissection
	Tropic	Panama	Sherman Forest Reserve	9.36073	-79.9627	59	3JUN05	Termitidae	Syntermitinae	Cornitermes	walkeri	subterranean	wood		Tylenchid parasite (Howardula? sp. 3)	Dissection
	Tropic	Panama	Sherman Forest Reserve 3	9.30184	-79.9429	16	3JUN05	Termitidae	Syntermitinae	Cornitermes	walkeri	subterranean	wood		Pana1 sp. 6., Thelastomatidae sp. 2	Dissection
	Tropic	Panama	Sherman Forest Reserve 3	9.30184	-79.9429	16	3JUN05	Termitidae	Syntermitinae	Cornitermes	walkeri	subterranean	wood		Pana1 sp. 6., Thelastomatidae sp. 2., Diplo4 sp.	Dissection
	Tropic	Panama	BCI				MAY08	Termitidae	Termitinae	Cylindrotermes	macrognathus	subterranean	wood			Squash on BA
	Tropic	Panama	El Cope Natl Park 2	8.66907	-80.5918	834	30MAY05	Termitidae	Termitinae	Cylindrotermes	macrognathus	subterranean	wood		Diplo3 sp.	Dissection
	Tropic	Panama	El Cope Natl Park 2	8.66907	-80.5918	834	30MAY05	Termitidae	Termitinae	Cylindrotermes	macrognathus	subterranean	wood		Oigolaimella sp. 4.	Dissection
	Tropic	Panama	El Cope Natl Park 2	8.66907	-80.5918	834	30MAY05	Termitidae	Termitinae	Cylindrotermes	macrognathus	subterranean	wood		Oigolaimella sp. 4., Diplo3 sp., Diplo4 sp.	Dissection
	Tropic	Panama	El Cope Natl Park 2	8.66907	-80.5918	834	30MAY05	Termitidae	Termitinae	Cylindrotermes	macrognathus	subterranean	wood		Oigolaimella sp. 4., Steinernema sp., Unknown species	Dissection
	Tropic	Panama	El Cope Natl Park 2	8.66907	-80.5918	834	30MAY05	Termitidae	Termitinae	Cylindrotermes	macrognathus	subterranean	wood			Dissection
	Tropic	Panama	Llorona Nematode transects	9.34332	-79.7742		4JUN05	Termitidae	Termitinae	Cylindrotermes	macrognathus	subterranean	wood		Diplo2 sp. 2	Dissection
	Tropic	Panama	Llorona Nematode transects	9.34332	-79.7742		4JUN05	Termitidae	Termitinae	Cylindrotermes	macrognathus	subterranean	wood		Steinernema sp., Unknown species	Dissection
	Tropic	Panama	Llorona Nematode transects	9.34332	-79.7742		4JUN05	Termitidae	Termitinae	Cylindrotermes	macrognathus	subterranean	wood		Unknown species	Dissection
	Tropic	Panama	Llorona Nematode transects	9.34332	-79.7742		4JUN05	Termitidae	Termitinae	Cylindrotermes	macrognathus	subterranean	wood		Oigolaimella sp. 5., Diplo2 sp. 2	Dissection
	Tropic	Panama	Llorona Nematode transects	9.34332	-79.7742		4JUN05	Termitidae	Termitinae	Cylindrotermes	macrognathus	subterranean	wood			Dissection
	Tropic	Panama	Llorona Nematode transects	9.34332	-79.7742		4JUN05	Termitidae	Termitinae	Cylindrotermes	macrognathus	subterranean	wood			Dissection
	Tropic	Costa Rica	La Selva	10.25525 N	84.00130 W	60	2008	Termitidae	Termitinae	Cylindrotermes	macrognathus	subterranean	wood	#2	Halicephalobus sp. 1, Bunonema sp. 1, Poikilolaimus sp., Ps. yukiae, Diplogastridae sp.	Squash on BA	2008-04
	Tropic	Costa Rica	La Selva	10.25525 N	84.00130 W	60	2008	Termitidae	Termitinae	Cylindrotermes	macrognathus	subterranean	wood	#1		Squash on BA	2008-02
	Tropic	Costa Rica	La Selva	10.25525 N	84.00130 W	60	2008	Termitidae	Termitinae	Cylindrotermes	macrognathus	subterranean	wood	#3		Squash on BA	2008-05
	Tropic	Costa Rica	La Selva	10.25525 N	84.00130 W	60	3/12-15/2005	Termitidae	Termitinae	Cylindrotermes	macrognathus	subterranean	wood	#2	Aphel3. sp.	Dissection	T801Z3
	Tropic	Costa Rica	La Selva	10.25525 N	84.00130 W	60	3/12-15/2005	Termitidae	Termitinae	Cylindrotermes	macrognathus	subterranean	wood	#6	Poikilolaimus sp. 1., Aphel1. sp. 2	Dissection	T803X2
	Tropic	Costa Rica	La Selva	10.25525 N	84.00130 W	60	3/12-15/2005	Termitidae	Termitinae	Cylindrotermes	macrognathus	subterranean	wood	#7	Unknown species	Dissection	T803Y1
	Tropic	Costa Rica	La Selva	10.25525 N	84.00130 W	60	3/12-15/2005	Termitidae	Termitinae	Cylindrotermes	macrognathus	subterranean	wood	#9	Diplo1 sp. 3	Dissection	T803Z1
	Tropic	Costa Rica	La Selva	10.25525 N	84.00130 W	60	3/12-15/2005	Termitidae	Termitinae	Cylindrotermes	macrognathus	subterranean	wood	#10	Unknown species	Dissection	T804Z3
	Tropic	Costa Rica	La Selva	10.25525 N	84.00130 W	60	3/12-15/2005	Termitidae	Termitinae	Cylindrotermes	macrognathus	subterranean	wood	#1	Bunonema sp. 1	Dissection	T801Y1
	Tropic	Costa Rica	La Selva	10.25525 N	84.00130 W	60	3/12-15/2005	Termitidae	Termitinae	Cylindrotermes	macrognathus	subterranean	wood	#3		Dissection	T802X1
	Tropic	Costa Rica	La Selva	10.25525 N	84.00130 W	60	3/12-15/2005	Termitidae	Termitinae	Cylindrotermes	macrognathus	subterranean	wood	#4		Dissection	T803W1
	Tropic	Costa Rica	La Selva	10.25525 N	84.00130 W	60	3/12-15/2005	Termitidae	Termitinae	Cylindrotermes	macrognathus	subterranean	wood	#5		Dissection	T803W2
	Tropic	Costa Rica	La Selva	10.25525 N	84.00130 W	60	3/12-15/2005	Termitidae	Termitinae	Cylindrotermes	macrognathus	subterranean	wood	#8		Dissection	T803Y2
	Tropic	Costa Rica	La Selva	10.25525 N	84.00130 W	60	3/12-15/2005	Termitidae	Termitinae	Cylindrotermes	macrognathus	subterranean	wood		Poikilolaimus sp. 1., Unknown species	Dissection	T801Z4
	Tropic	Costa Rica	La Selva	10.25525 N	84.00130 W	60	2008	Termitidae	Termitinae	Cylindrotermes	macrognathus	subterranean	wood		Bunonema sp. 1	Squash on BA	2008-10
	Tropic	Costa Rica	La Selva	10.25525 N	84.00130 W	60	3/12-15/2005	Termitidae	Termitinae	Cylindrotermes	macrognathus	subterranean	wood			Dissection	T801W1
	Tropic	Costa Rica	La Selva	10.25525 N	84.00130 W	60	3/12-15/2005	Termitidae	Termitinae	Cylindrotermes	macrognathus	subterranean	wood			Dissection	T801Z1
	Tropic	Costa Rica	La Selva	10.25525 N	84.00130 W	60	3/12-15/2005	Termitidae	Syntermitinae	Embiratermes	chagresi	subterranean	soil			Dissection	T802Z1
	Tropic	Panama	Llorona Nematode transects	9.34332	-79.7742		4JUN05	Termitidae	Syntermitinae	Embiratermes	chagresi	subterranean	soil		Thelastomatidae sp. 1	Dissection
	Tropic	Panama	Llorona Nematode transects	9.34332	-79.7742		4JUN05	Termitidae	Syntermitinae	Embiratermes	chagresi	subterranean	soil		Oigolaimella sp. 2., Thelastomatidae sp. 1	Dissection
	Tropic	Panama	Llorona Nematode transects	9.34332	-79.7742		4JUN05	Termitidae	Syntermitinae	Embiratermes	chagresi	subterranean	soil		Thelastomatidae sp. 1	Dissection
	Tropic	Panama	Sherman Forest Reserve	9.36073	-79.9627	59	3JUN05	Termitidae	Syntermitinae	Embiratermes	chagresi	subterranean	soil		Pana1 sp. 6., Thelastomatidae sp. 1., Diplo4 sp.	Dissection
	Tropic	Costa Rica	La Selva	10.25525 N	84.00130 W	60	2008	Termitidae	Syntermitinae	Embiratermes	chagrasi	subterranean	soil	#1	Thelastmatidae sp. 1	Dissection / Squash on BA	2008-01
	Tropic	Costa Rica	La Selva	10.25525 N	84.00130 W	60	2008	Termitidae	Syntermitinae	Embiratermes	chagrasi	subterranean	soil	#2	Thelastmatidae sp. 1	Dissection / Squash on BA	2008-13
	Tropic	Costa Rica	La Selva	10.25525 N	84.00130 W	60	2008	Termitidae	Syntermitinae	Embiratermes	chagrasi	subterranean	soil	#3	Thelastmatidae sp. 1	Dissection / Squash on BA	2008-07
	Tropic	Panama	End of Pipeline road	9.12209	-79.7157	25	1JUN05	Termitidae	Syntermitinae	Embiratermes	chagresi	subterranean	soil		Thelastmatidae sp. 1	Dissection
	Tropic	Panama	El Valle, Hotel Campestre	8.61435	-80.1129	6	29MAY05	Termitidae	Termitinae	Microcerotermes	arboreus	soil/arboreal nest	wood		Oigolaimella sp. 4	Dissection
	Tropic	Panama	El Valle, Hotel Campestre	8.61435	-80.1129	6	29MAY05	Termitidae	Termitinae	Microcerotermes	arboreus	soil/arboreal nest	wood		Aphel1 sp. 2., Oigolaimella sp. 5., Steinernema sp.	Dissection
	Tropic	Panama	El Valle, Hotel Campestre	8.61435	-80.1129	6	29MAY05	Termitidae	Termitinae	Microcerotermes	arboreus	soil/arboreal nest	wood			Dissection
	Tropic	Panama	11 km W Palenque	9.57133	-79.3856	16	2JUN05	Termitidae	Termitinae	Microcerotermes	exiguus	soil/arboreal nest	wood		Aphel1. sp. 1., Diplo1 sp. 2., Pana1 sp. 5	Dissection
	Tropic	Panama	BCI				MAY08	Termitidae	Termitinae	Microcerotermes	exiguus	soil/arboreal nest	wood	#4	Ps. vindai	Squash on BA
	Tropic	Panama	BCI				MAY08	Termitidae	Termitinae	Microcerotermes	exiguus	soil/arboreal nest	wood	#3	Unknown species	Squash on BA
	Tropic	Panama	BCI				MAY08	Termitidae	Termitinae	Microcerotermes	exiguus	soil/arboreal nest	wood	#5	Unknown species	Squash on BA
	Tropic	Panama	BCI				MAY08	Termitidae	Termitinae	Microcerotermes	exiguus	soil/arboreal nest	wood	#1		Squash on BA
	Tropic	Panama	BCI				MAY08	Termitidae	Termitinae	Microcerotermes	exiguus	soil/arboreal nest	wood	#2		Squash on BA
	Tropic	Panama	Campestre Nematode transects	8.61623	-80.1103	698	31MAY05	Termitidae	Termitinae	Microcerotermes	exiguus	soil/arboreal nest	wood		Unknown species	Dissection
	Tropic	Panama	El Charco trail, Soberania NP	9.08148	-79.666		1JUN05	Termitidae	Termitinae	Microcerotermes	exiguus	soil/arboreal nest	wood			Dissection
	Tropic	Panama	El Charco trail, Soberania NP	9.08148	-79.666		1JUN05	Termitidae	Termitinae	Microcerotermes	exiguus	soil/arboreal nest	wood			Dissection
	Tropic	Panama	El Valle, Hotel Campestre	8.61435	-80.1129	6	29MAY05	Termitidae	Termitinae	Microcerotermes	exiguus	soil/arboreal nest	wood			Dissection
	Tropic	Panama	End of Pipeline road	9.12209	-79.7157	25	1JUN05	Termitidae	Termitinae	Microcerotermes	exiguus	soil/arboreal nest	wood		Oigolaimella sp. 4	Dissection
	Tropic	Panama	End of Pipeline road	9.12209	-79.7157		1JUN05	Termitidae	Termitinae	Microcerotermes	exiguus	soil/arboreal nest	wood			Dissection
	Tropic	Panama	End of Pipeline road	9.12209	-79.7157		1JUN05	Termitidae	Termitinae	Microcerotermes	exiguus	soil/arboreal nest	wood			Dissection
	Tropic	Panama	La Tronosa Reserve	7.35094	-80.5168	110	29MAY05	Termitidae	Termitinae	Microcerotermes	exiguus	soil/arboreal nest	wood		Oigolaimella sp. 4.	Dissection
	Tropic	Panama	Llorona Nematode transects	9.34332	-79.7742		4JUN05	Termitidae	Termitinae	Microcerotermes	exiguus	soil/arboreal nest	wood			Dissection
	Tropic	Panama	nr Palenque; seagrape	9.57705	-79.3222	13	2JUN05	Termitidae	Termitinae	Microcerotermes	exiguus	soil/arboreal nest	wood		Oigolaimella sp. 5., Steinernema sp.	Dissection
	Tropic	Panama	Playa Venado	7.43234	-80.2039	28	29MAY05	Termitidae	Termitinae	Microcerotermes	exiguus	soil/arboreal nest	wood		Halicephalobus sp. 6	Dissection
	Tropic	Panama	Playa Venado	7.43234	-80.2039	28	29MAY05	Termitidae	Termitinae	Microcerotermes	exiguus	soil/arboreal nest	wood		Steinernema sp.	Dissection
	Tropic	Panama	Playa Venado	7.43234	-80.2039	28	29MAY05	Termitidae	Termitinae	Microcerotermes	exiguus	soil/arboreal nest	wood			Dissection
	Tropic	Panama	Playa Venado	7.43234	-80.2039	28	29MAY05	Termitidae	Termitinae	Microcerotermes	exiguus	soil/arboreal nest	wood			Dissection
	Tropic	Panama	Pocri area pastureland	7.67865	-80.1597	59	29MAY05	Termitidae	Termitinae	Microcerotermes	exiguus	soil/arboreal nest	wood			Dissection
	Tropic	Panama	Pocri area pastureland	7.67865	-80.1597	59	29MAY05	Termitidae	Termitinae	Microcerotermes	exiguus	soil/arboreal nest	wood			Dissection
	Tropic	Panama	Campestre Nematode transects	8.61623	-80.1103	698	31MAY05	Termitidae	Nasutitermitinae	Nasutitermes	corniger	arboreal	wood		Unknown species	Dissection
	Tropic	Panama	Campestre Nematode transects	8.61623	-80.1103	698	31MAY05	Termitidae	Nasutitermitinae	Nasutitermes	corniger	arboreal	wood			Dissection
	Tropic	Panama	Campestre Nematode transects	8.61623	-80.1103		31MAY05	Termitidae	Nasutitermitinae	Nasutitermes	corniger	arboreal	wood			Dissection
	Tropic	Panama	Campestre Nematode transects	8.61623	-80.1103		31MAY05	Termitidae	Nasutitermitinae	Nasutitermes	corniger	arboreal	wood			Dissection
	Tropic	Panama	Campestre Nematode transects	8.61623	-80.1103		31MAY05	Termitidae	Nasutitermitinae	Nasutitermes	corniger	arboreal	wood			Dissection
	Tropic	Panama	Campestre Nematode transects	8.61623	-80.1103		31MAY05	Termitidae	Nasutitermitinae	Nasutitermes	corniger	arboreal	wood			Dissection
	Tropic	Panama	Campestre Nematode transects	8.61623	-80.1103	698	31MAY05	Termitidae	Nasutitermitinae	Nasutitermes	corniger	arboreal	wood			Dissection
	Tropic	Panama	Campestre Nematode transects	8.61623	-80.1103		31MAY05	Termitidae	Nasutitermitinae	Nasutitermes	corniger	arboreal	wood			Dissection
	Tropic	Panama	Campestre Nematode transects	8.61623	-80.1103		31MAY05	Termitidae	Nasutitermitinae	Nasutitermes	corniger	arboreal	wood			Dissection
	Tropic	Panama	Campestre Nematode transects	8.61623	-80.1103		31MAY05	Termitidae	Nasutitermitinae	Nasutitermes	corniger	arboreal	wood			Dissection
	Tropic	Panama	Campestre Nematode transects	8.61623	-80.1103		31MAY05	Termitidae	Nasutitermitinae	Nasutitermes	corniger	arboreal	wood			Dissection
	Tropic	Panama	Campestre Nematode transects	8.61623	-80.1103		31MAY05	Termitidae	Nasutitermitinae	Nasutitermes	corniger	arboreal	wood			Dissection
	Tropic	Panama	Campestre Nematode transects	8.61623	-80.1103		31MAY05	Termitidae	Nasutitermitinae	Nasutitermes	corniger	arboreal	wood			Dissection
	Tropic	Panama	Campestre Nematode transects	8.61623	-80.1103		31MAY05	Termitidae	Nasutitermitinae	Nasutitermes	corniger	arboreal	wood			Dissection
	Tropic	Panama	El Cope Natl Park 1	8.67901	-80.5972	841	30MAY05	Termitidae	Nasutitermitinae	Nasutitermes	corniger	arboreal	wood		Unknown species	Dissection
	Tropic	Panama	El Valle, Hotel Campestre	8.61435	-80.1129	6	29MAY05	Termitidae	Nasutitermitinae	Nasutitermes	corniger	arboreal	wood			Dissection
	Tropic	Panama	El Valle, Hotel Campestre	8.61435	-80.1129	6	29MAY05	Termitidae	Nasutitermitinae	Nasutitermes	corniger	arboreal	wood			Dissection
	Tropic	Panama	End of Pipeline road	9.12209	-79.7157		1JUN05	Termitidae	Nasutitermitinae	Nasutitermes	corniger	arboreal	wood			Dissection
	Tropic	Panama	La Tronosa Reserve	7.35094	-80.5168	110	29MAY05	Termitidae	Nasutitermitinae	Nasutitermes	corniger	arboreal	wood		Oigolaimella sp. 5.	Dissection
	Tropic	Panama	Playa Venado	7.43234	-80.2039	28	29MAY05	Termitidae	Nasutitermitinae	Nasutitermes	corniger	arboreal	wood			Dissection
	Tropic	Costa Rica	La Selva	10.25525 N	84.00130 W	60	2008	Termitidae	Nasutitermitinae	Nasutitermes	corniger	arboreal	wood	#1	unidentified rhabditid (Rhabd1) sp. 1	Squash on BA	2008-03
	Tropic	Costa Rica	La Selva	10.25525 N	84.00130 W	60	3/12-15/2005	Termitidae	Nasutitermitinae	Nasutitermes	corniger	arboreal	wood	#1		Dissection	T802W1
	Tropic	Costa Rica	La Selva	10.25525 N	84.00130 W	60	3/12-15/2005	Termitidae	Nasutitermitinae	Nasutitermes	corniger	arboreal	wood	#2		Dissection	T802W2
	Tropic	Costa Rica	La Selva	10.25525 N	84.00130 W	60	3/12-15/2005	Termitidae	Nasutitermitinae	Nasutitermes	corniger	arboreal	wood	#3		Dissection	T802Z2
	Tropic	Costa Rica	La Selva	10.25525 N	84.00130 W	60	3/12-15/2005	Termitidae	Nasutitermitinae	Nasutitermes	corniger	arboreal	wood	#4		Dissection	T804Y2
	Tropic	Costa Rica	La Selva	10.25525 N	84.00130 W	60	2008	Termitidae	Nasutitermitinae	Nasutitermes	corniger	arboreal	wood	#2		Squash on BA	2008-08
	Tropic	Panama	Alto de la Cruz	9.45063	-79.7412	6	2JUN05	Termitidae	Nasutitermitinae	Nasutitermes	ephratae	arboreal	wood			Dissection
	Tropic	Panama	El Valle, Hotel Campestre	8.61435	-80.1129	6	29MAY05	Termitidae	Nasutitermitinae	Nasutitermes	ephratae	arboreal	wood			Dissection
	Tropic	Panama	nr Palenque; seagrape	9.57705	-79.3222	13	2JUN05	Termitidae	Nasutitermitinae	Nasutitermes	ephratae	arboreal	wood		Pana1 sp. 5., Bunonema sp.	Dissection
	Tropic	Panama	W. La Pintada	8.63077	-80.4863	109	30MAY05	Termitidae	Nasutitermitinae	Nasutitermes	ephratae	arboreal	wood		Oigolaimella sp. 4.	Dissection
	Tropic	Costa Rica	La Selva	10.25525 N	84.00130 W	60	2008	Termitidae	Nasutitermitinae	Nasutitermes	ephratae	arboreal	wood	#2	Halicephalobus sp. 3	Squash on BA	2008-14
	Tropic	Costa Rica	La Selva	10.25525 N	84.00130 W	60	2008	Termitidae	Nasutitermitinae	Nasutitermes	ephratae	arboreal	wood	#1	unidentified rhabditid (Rhabd1) sp. 1	Squash on BA	2008-06
	Tropic	Panama	El Cope Natl Park 2	8.66907	-80.5918	834	30MAY05	Termitidae	Nasutitermitinae	Nasutitermes	glabritergus	subterranean	wood		Oigolaimella sp. 2., Unknown species	Dissection
	Tropic	Panama	BCI				MAY08	Termitidae	Nasutitermitinae	Nasutitermes	guayanae	arboreal	wood	#1	Unknown species	Squash on BA
	Tropic	Panama	BCI				MAY08	Termitidae	Nasutitermitinae	Nasutitermes	guayanae	arboreal	wood	#2		Squash on BA
	Tropic	Panama	Campestre Nematode transects	8.61623	-80.1103		31MAY05	Termitidae	Nasutitermitinae	Nasutitermes	guayanae	arboreal	wood			Dissection
	Tropic	Panama	Campestre Nematode transects	8.61623	-80.1103		31MAY05	Termitidae	Nasutitermitinae	Nasutitermes	guayanae	arboreal	wood			Dissection
	Tropic	Panama	Campestre Nematode transects	8.61623	-80.1103		31MAY05	Termitidae	Nasutitermitinae	Nasutitermes	guayanae	arboreal	wood			Dissection
	Tropic	Panama	Campestre Nematode transects	8.61623	-80.1103		31MAY05	Termitidae	Nasutitermitinae	Nasutitermes	guayanae	arboreal	wood			Dissection
	Tropic	Panama	El Valle, Hotel Campestre	8.61435	-80.1129	6	29MAY05	Termitidae	Nasutitermitinae	Nasutitermes	guayanae	arboreal	wood			Dissection
	Tropic	Panama	El Valle, Hotel Campestre	8.61435	-80.1129	6	29MAY05	Termitidae	Nasutitermitinae	Nasutitermes	guayanae	arboreal	wood			Dissection
	Tropic	Panama	Llorona Nematode transects	9.34332	-79.7742		4JUN05	Termitidae	Nasutitermitinae	Nasutitermes	guayanae	arboreal	wood			Dissection
	Tropic	Panama	Llorona Nematode transects	9.34332	-79.7742		4JUN05	Termitidae	Nasutitermitinae	Nasutitermes	guayanae	arboreal	wood			Dissection
	Tropic	Panama	Llorona Nematode transects	9.34332	-79.7742		4JUN05	Termitidae	Nasutitermitinae	Nasutitermes	guayanae	arboreal	wood			Dissection
	Tropic	Panama	Playa Cambutal	7.25147	-80.5083	23	29MAY05	Termitidae	Nasutitermitinae	Nasutitermes	guayanae	arboreal	wood			Dissection
	Tropic	Panama	Playa Venado	7.43234	-80.2039	28	29MAY05	Termitidae	Nasutitermitinae	Nasutitermes	guayanae	arboreal	wood			Dissection
	Tropic	Panama	Playa Venado	7.43234	-80.2039	28	29MAY05	Termitidae	Nasutitermitinae	Nasutitermes	guayanae	arboreal	wood			Dissection
	Tropic	Panama	Sierra Llorona Los Nances trail	9.3426	-79.7745	187	2JUN05	Termitidae	Nasutitermitinae	Nasutitermes	guayanae	arboreal	wood		Aphel1. sp. 3., Oigolaimella sp. 4	Dissection
	Tropic	Panama	La Tronosa Reserve	7.35094	-80.5168	110	29MAY05	Termitidae	Nasutitermitinae	Nasutitermes	nigriceps	arboreal	wood			Dissection
	Tropic	Panama	Campestre Nematode transects	8.61623	-80.1103		31MAY05	Termitidae	Nasutitermitinae	Nasutitermes	n. sp. nr. corniger	arboreal	wood		Pana1 sp. 6., Oigolaimella sp. 4.	Dissection
	Tropic	Panama	Campestre Nematode transects	8.61623	-80.1103		31MAY05	Termitidae	Nasutitermitinae	Nasutitermes	n. sp. nr. corniger	arboreal	wood			Dissection
	Tropic	Panama	Campestre Nematode transects	8.61623	-80.1103		31MAY05	Termitidae	Nasutitermitinae	Nasutitermes	n. sp. nr. corniger	arboreal	wood			Dissection
	Tropic	Panama	El Valle trail west of town	8.61309	-80.1448	610	31MAY05	Termitidae	Nasutitermitinae	Nasutitermes	n. sp. nr. corniger	arboreal	wood			Dissection
	Tropic	Panama	El Valle, Hotel Campestre	8.61435	-80.1129	6	29MAY05	Termitidae	Nasutitermitinae	Nasutitermes	n. sp. nr. corniger	arboreal	wood			Dissection
	Tropic	Panama	Fort Sherman swamp	9.359	-79.9516	5	3JUN05	Termitidae	Nasutitermitinae	Nasutitermes	n. sp. nr. corniger	arboreal	wood			Dissection
	Tropic	Panama	El Cope Natl Park 1	8.67901	-80.5972	841	30MAY05	Termitidae	Nasutitermitinae	Nasutitermes	s.l. n.sp.	subterranean	wood			Dissection
	Tropic	Panama	BCI				MAY08	Termitidae	Nasutitermitinae	Obtusitermes	panamae	subterranean	soil/wood		Ps. vindai, Halicephalobus sp. 4, Bunonema sp. 2	Squash on BA
	Tropic	Panama	Portobelo	9.54451	-79.6725	23	2JUN05	Termitidae	Nasutitermitinae	Obtusitermes	panamae	subterranean	soil/wood		Aphel1. sp. 4., Unknown species	Dissection
	Tropic	Panama	W Portobelo	9.4918	-79.7049	12	2JUN05	Termitidae	Nasutitermitinae	Obtusitermes	panamae	subterranean	soil/wood		Oigolaimella sp. 4	Dissection
	Tropic	Panama	El Cope Natl Park 1	8.67901	-80.5972	841	30MAY05	Termitidae	Syntermitinae	Rhynchotermes	perarmatus	soil mound	surface litter		Oigolaimella sp. 2	Dissection
	Tropic	Panama	below El Cope park	8.64578	-80.588	800	30MAY05	Termitidae	Apicotermitinae	Ruptitermes	n. sp.	subterranean	surface litter			Dissection
	Tropic	Panama	El Valle, Hotel Campestre	8.61435	-80.1129	6	29MAY05	Termitidae	Apicotermitinae	Ruptitermes	n. sp.	subterranean	surface litter			Dissection
	Tropic	Panama	Sierra Llorona Los Nances trail	9.3426	-79.7745	187	2JUN05	Termitidae	Nasutitermitinae	Subulitermes	denisae	subterranean	soil/wood			Dissection
	Tropic	Costa Rica	La Selva	10.25525 N	84.00130 W	60	2008	Termitidae	Nasutitermitinae	Subulitermes	denisae	subterranean	soil/wood			Squash on BA	2008-11
	Tropic	Panama	La Tronosa Reserve	7.35094	-80.5168	110	29MAY05	Termitidae	Nasutitermitinae	Subulitermes	zeteki	subterranean	soil/wood			Dissection
	Tropic	Panama	Isla Canas Wildlife Preserve	7.42355	-80.3146	9	29MAY05	Termitidae	Termitinae	Termes	hispaniolae	arboreal	wood			Dissection
	Tropic	Costa Rica	La Selva	10.25525 N	84.00130 W	60	2008	Termitidae	Termitinae	Termes	hispaniolae	arboreal	wood			Squash on BA	2008-12
	Tropic	Panama	End of Pipeline road	9.12209	-79.7157	25	1JUN05	Termitidae	Termitinae	Termes	panamaensis	arboreal	wood			Dissection
