# Supplementary material for: Reverse Taxonomy for Elucidating Diversity of Insect-Associated Nematodes: A Case Study with Termites
Source: PLoS One. 2012 Aug 28;7(8):e43865. doi: 10.1371/journal.pone.0043865 (PMC3429485; doi:10.1371/journal.pone.0043865)
Supplement: Table S2 — Nematode species isolated from each termite species. (EXL) (XLS) [file pone.0043865.s002.xls]

## Sheet: Suppl Table 2
	Supplemental Table 2. Nematode species isolated from each termite species
	Family	Subfamily	Genus	Species	Habitat (nest)	Feeding resource	Method	# of colonies	Poikilolaimus			Halicephalobus						Oigolaimella							Panaglolaimomorpha							Diplo1			Diplo2		Diplo3	Diplo 4	Pseudaphelenchus			Aphel1				Aphel2	Aphel3	Tylenchid parasite
									floridensis	sp. 1	sp. 2	sp. 1	sp. 2	sp. 3	sp. 4	sp. 5	sp. 6	sp. 1	sp. 2	sp. 3	sp. 4	sp. 5	sp. 6	sp. 7	sp. 1	sp. 2	sp. 3	sp. 4	sp. 5	sp. 6	sp. 7	sp. 1	sp. 2	sp. 3	sp. 1	sp. 2	sp.	sp.	yukiae	vindai	sp. 1	sp. 1	sp. 2	sp. 3	sp. 4	sp.	sp.	sp. 1	sp. 2
	Kalotermitidae		Cryptotermes	longicollis	wood	seasonally dry wood	Dissection	3
	Kalotermitidae		Neotermes	holmgreni	wood	seasonally dry wood	Dissection	2						Halic. sp. 3
	Kalotermitidae		Neotermes	jouteli	wood	seasonally dry wood	Dissection	1	Po. floridensis
	Kalotermitidae		Cryptotermes	cavifrons	wood	seasonally dry wood	Dissection	5	Po. Floridensis*
	Kalotermitidae		Incisitermes	schwarzi	wood	seasonally dry wood	Dissection	5																					Pana. sp. 5
	Kalotermitidae		Incisitermes	snyderi	wood	seasonally dry wood	Dissection	1	Po. floridensis
	Kalotermitidae		Comatermes	perfectus	wood	damp wood	Dissection	14								Halic. sp. 5					Oigol. sp. 4											Dip1 sp. 1
	Kalotermitidae		Rugitermes	panamae	wood	damp wood	Dissection	1																			Pana. sp. 3
	Kalotermitidae		Calcaritermes	emarginicollis nr	wood	damp wood	Dissection	2																Oigo. sp. 7					Pana. sp. 5
	Kalotermitidae		Calcaritermes	temnocephalus	wood	damp wood	Dissection	1																														Dip4 sp.
	Kalotermitidae		Calcaritermes	emarginicollis	wood	damp wood	Dissection	1																	Pana. sp. 1
	Kalotermitidae		Calcaritermes	brevicollis	wood	damp wood	Dissection	1
	Kalotermitidae		Neotermes	castaneus	wood	damp wood	Dissection	3	Po. floridensis
	Kalotermitidae		Glyptotermes	barbouri	wood	damp wood	Dissection	1
	Rhinotermitidae		Prorhinotermes	molinoi	soil/wood	wood	Dissection	1
	Rhinotermitidae		Prorhinotermes	simplex	soil/wood	wood	Dissection	2
	Rhinotermitidae		Coptotermes	testaceus	inside tree trunk	wood	Dissection	18									Halic. sp. 6		Oigo. sp. 2		Oigol. sp. 4							Pana. sp. 4										Dip4 sp.	Ps. yukiae		Ps. sp. 1	Ap1 sp. 1						TP sp. 1	TP sp. 2
	Rhinotermitidae		Coptotermes	testaceus	inside tree trunk	wood	Squash on BA	1					Halic. sp. 2					Oigo. sp. 1
	Rhinotermitidae		Dolichorhinotermes	longidens	subterranean	wood	Dissection	2
	Rhinotermitidae		Heterotermes	convexinotatus	subterranean	wood	Dissection	2
	Rhinotermitidae		Heterotermes	convexinotatus	subterranean	wood	Squash on BA	3											Oigo. sp. 2
	Rhinotermitidae		Heterotermes	tenuis	subterranean	wood	Dissection	34							Halic. sp. 4				Oigo. sp. 2		Oigo. sp. 4	Oigo. sp. 5								Pana. sp. 6	Pana. sp. 7							Dip4 sp.		Ps. vindai			Ap1 sp. 2
	Rhinotermitidae		Heterotermes	tenuis	subterranean	wood	Squash on BA	5							Halic. sp. 4				Oigo. sp. 2
	Rhinotermitidae		Reticulitermes	flavipes	subterranean	wood	Dissection	4																						Pana. sp. 6
	Termitidae	Nasutitermitinae	Nasutitermes	corniger	arboreal	wood	Dissection	24														Oigo. sp. 5.
	Termitidae	Nasutitermitinae	Nasutitermes	corniger	arboreal	wood	Squash on BA	2
	Termitidae	Nasutitermitinae	Nasutitermes	ephratae	arboreal	wood	Dissection	4													Oigo. sp. 4.								Pana. sp. 5
	Termitidae	Nasutitermitinae	Nasutitermes	ephratae	arboreal	wood	Squash on BA	2						Halic. sp. 3
	Termitidae	Nasutitermitinae	Nasutitermes	glabritergus	subterranean	wood	Dissection	1											Oigo. sp. 2		Oigo. sp. 4																							Ap1 sp. 3
	Termitidae	Nasutitermitinae	Nasutitermes	guayanae	arboreal	wood	Dissection	13
	Termitidae	Nasutitermitinae	Nasutitermes	guayanae	arboreal	wood	Squash on BA	2
	Termitidae	Nasutitermitinae	Nasutitermes	nigriceps	arboreal	wood	Dissection	1
	Termitidae	Nasutitermitinae	Nasutitermes	n. sp. nr. corniger	arboreal	wood	Dissection	6													Oigo. sp. 4									Pana. sp. 6
	Termitidae	Termitinae	Termes	hispaniolae	arboreal	wood	Dissection	1
	Termitidae	Termitinae	Termes	hispaniolae	arboreal	wood	Squash on BA	1
	Termitidae	Termitinae	Termes	panamaensis	arboreal	wood	Dissection	1
	Termitidae	Termitinae	Amitermes	foreli	soil mound	grass	Dissection	3													Oigo. sp. 4
	Termitidae	Termitinae	Microcerotermes	arboreus	soil/arboreal nest	wood	Dissection	3													Oigo. sp. 4	Oigo. sp. 5																					Ap1 sp. 2
	Termitidae	Termitinae	Microcerotermes	exiguus	soil/arboreal nest	wood	Dissection	17									Halic. sp. 6				Oigo. sp. 4	Oigo. sp. 5.							Pana. sp. 5				Dip1 sp. 2									Ap1 sp. 1
	Termitidae	Termitinae	Microcerotermes	exiguus	soil/arboreal nest	wood	Squash on BA	5																																Ps. vindai
	Termitidae	Syntermitinae	Rhynchotermes	perarmatus	soil mound	surface litter	Dissection	1											Oigo. sp. 2
	Termitidae	Apicotermitinae	Ruptitermes	n. sp.	subterranean	surface litter	Dissection	2
	Termitidae	Syntermitinae	Cornitermes	walkeri	subterranean	wood	Dissection	10
	Termitidae	Syntermitinae	Cornitermes	walkeri	subterranean	wood	Squash on BA	3													Oigo. sp. 4									Pana. sp. 6								Dip4 sp.
	Termitidae	Termitinae	Cylindrotermes	macrognathus	subterranean	wood	Dissection	24		Po. sp.											Oigo. sp. 4	Oigo. sp. 5												Dip1 sp. 3		Dip2 sp. 2	Dip3. sp.	Dip4 sp.					Ap1 sp. 2				Ap3 sp.
	Termitidae	Termitinae	Cylindrotermes	macrognathus	subterranean	wood	Squash on BA	5		Po. sp.		Halic. sp. 1																											Ps. yukiae
	Termitidae	Nasutitermitinae	Nasutitermes	s.l. n. sp.	subterranean	wood	Dissection	1											Oigo. sp. 2											Pana. sp. 6
	Termitidae	Termitinae	Amitermes	beaumonti	subterranean	wood	Dissection	19									Halic. sp. 6		Oigo. sp. 2				Oigo. sp. 6												Dip2 sp. 1	Dip2 sp. 2										Ap2 sp.
	Termitidae	Termitinae	Amitermes	beaumonti	subterranean	wood	Squash on BA	4							Halic. sp. 4					Oigo. sp. 3																				Ps. vindai
	Termitidae	Nasutitermitinae	Obtusitermes	panamae	subterranean	soil/wood	Dissection	2											Oigo. sp. 2																										Ap1 sp. 4
	Termitidae	Nasutitermitinae	Obtusitermes	panamae	subterranean	soil/wood	Squash on BA	1							Halic. sp. 4																									Ps. vindai
	Termitidae	Apicotermitinae	Anoplotermes	s.l. n.sp.A	subterranean	soil	Dissection	6													Oigo. sp. 4			Oigo. sp. 7.
	Termitidae	Apicotermitinae	Anoplotermes	s.l. n.sp.B	subterranean	soil	Dissection	2
	Termitidae	Apicotermitinae	Anoplotermes	parvus	soil mound	soil	Dissection	7			Po. sp.
	Termitidae	Apicotermitinae	Anoplotermes	parvus	soil mound	soil	Squash on BA	1
	Termitidae	Apicotermitinae	Anoplotermes	schwarzi	subterranean	soil	Dissection	1
	Termitidae	Nasutitermitinae	Coatitermes	clevelandi	subterranean	soil	Dissection	1																		Pana. sp. 2
	Termitidae	Syntermitinae	Embiratermes	chagresi	subterranean	soil	Dissection	9											Oigo. sp. 2.											Pana. sp. 6								Dip4 sp.
	Termitidae	Syntermitinae	Embiratermes	chagrasi	subterranean	soil	Squash on BA	3
	Termitidae	Nasutitermitinae	Subulitermes	denisae	subterranean	soil/wood	Dissection	1
	Termitidae	Nasutitermitinae	Subulitermes	denisae	subterranean	soil/wood	Squash on BA	1
	Termitidae	Nasutitermitinae	Subulitermes	zeteki	subterranean	soil/wood	Dissection	1
	* Kanzaki et al. (2009)
[truncated: 13 more columns]
