# Supplementary material for: Reverse Taxonomy for Elucidating Diversity of Insect-Associated Nematodes: A Case Study with Termites
Source: PLoS One. 2012 Aug 28;7(8):e43865. doi: 10.1371/journal.pone.0043865 (PMC3429485; doi:10.1371/journal.pone.0043865)
Supplement: Table S3 — Accession numbers for nematode barcodes. (EXL) (XLS) [file pone.0043865.s003.xls]

## Sheet: Suppl Table 3
	Supplemental Table 3. Accession numbers for nematode barcodes
	Tentative genus or higher taxonomic rank	Species	Accession number*
	Poikilolaimus	floridensis	AB370214
		sp. term1	AB455823
		sp. term2	AB663141, AB663142
	Halicephalobus	sp. term1	AB663143, AB663144
		sp. term2	AB663145
		sp. term3	AB663146
		sp. term4	AB663147, AB663148, AB663149, AB663150
		sp. term5	AB663151
		sp. term6	AB663152
	Oigolaimella	sp. term1	AB478630
		sp. term2	AB663153, AB663154, AB663155
		sp. term3	AB663156
		sp. term4	AB663157
		sp. term5	AB663158
		sp. term6	AB663159
		sp. term7	AB663160
	Panaglolaimomorpha	sp. term1	AB663161
		sp. term2	AB663162
		sp. term3	AB663163
		sp. term4	AB663164
		sp. term5	AB663165, AB663166
		sp. term6	AB663167
		sp. term7	AB663168
	Diplo 1	sp. term1	AB663169
		sp. term2	AB663170
		sp. term3	AB455825
	Diplo 2	sp. term1	AB663171
		sp. term2	AB663172, AB663173
		sp. term3	AB663174
	Diplo 3	sp. term1	AB663175
	Diplo 4	sp. term1	AB663176
	Pseudaphelenchus	yukiae	AB455827, AB470971
		vindai	AB537559, AB663177
		sp. term1	AB663178
	Aphel 1	sp. term1	AB663179
		sp. term2	AB455824
		sp. term3	AB663180
		sp. term4	AB663181
	Aphel2	sp. term1	AB455822
	Aphel3	sp. term2	AB663182
	Tylenchid parasite (near Howardula)	sp. term1	AB455970
		sp. term2	AB663183
		sp. term3	AB663184
	Rhabd1	sp. term1	AB663185
		sp. term2	AB663186
	Cruznema	sp. term1	AB663187
		sp. term2	AB663188
	Bunonema	sp. term1	AB663189
		sp. term2	AB663190
	Steinernema	sp. term1	AB663191
	Thelastomatidae	sp. term1	not asigned
		sp. term2	not asigned
		sp. term3	not asigned
		sp. term4	not asigned
	Rhabditis	rainai	AF083008
	Oscheius	sp. term1	AB455826
	* Some species (MOTUs) showed intraspecific divergence, and each sequence was stored in the Genbank database with unique accession number.
